# Supplementary material for: A colloidal heterostructured quantum dot sensitized carbon nanotube–TiO2 hybrid photoanode for high efficiency hydrogen generation
Source: Royal Society of Chemistry journal article supplement (doi:10.1039/c8nh00227d), 2018-11-06
Supplement: c8nh00227d1.pdf [file c8nh00227d1.pdf]

## Supporting information

### Colloidal Heterostructured Quantum Dots Sensitized Carbon

### Nanotubes-TiO<sub>2</sub> Hybrid Photoanode for High Efficiency Hydrogen

### Generation

Gurpreet Singh Selopal<sup>a,b</sup>, Mahyar Mohammadnezhad<sup>b</sup>, Fabiola Navarro-Pardo<sup>a,b</sup>, François Vidal<sup>b</sup>, Haiguang Zhao<sup>c,\*</sup>, Zhiming M. Wang<sup>b,\*</sup> and Federico Rosei<sup>a,b,\*</sup>

<sup>a</sup>Institute of Fundamental and Frontier Sciences, University of Electronic Science and Technology of China, Chengdu 610054, People's Republic of China.

<sup>b</sup>Institut National de la Recherche Scientifique, Centre Énergie, Matériaux et Télécommunications, 1650 Boul. Lionel Boulet, J3X 1S2 Varennes, Québec, Canada.

<sup>c</sup>The Cultivation Base for State Key Laboratory & College of Physics, Qingdao University, No. 308 Ningxia Road, Qingdao 266071, PR China

**Email** : hgzhao@qdu.edu.cn ; zhmwang@uestc.edu.cn ; rosei@emt.inrs.ca

## 1 **Experimental**

2

### 3 **Synthesis of CdSe QDs and core/shell QDs**

4 CdSe QDs were synthesized using the hot-injection approach<sup>1</sup>. Deposition of CdS layers  
5 on CdSe QDs followed procedures described elsewhere<sup>2</sup>. Typically, in a 50-mL round-  
6 bottom flask, OLA (5 ml), ODE (5 mL) and CdSe QDs ( $\sim 2 \times 10^{-7}$  mol in hexane) were  
7 degassed at 110 °C for 30 min. The reaction flask was re-stored with N<sub>2</sub> and the  
8 temperature was further raised to 240 °C with stirring. The Cd(OA)<sub>2</sub> dispersed in ODE (0.25  
9 mL, 0.2 M) was added dropwise and the mixture was allowed to react for 2.5 h, followed  
10 by dropwise addition of 0.2 M sulfur in ODE with the same volume. The shell was further  
11 annealed for 60 min. All subsequent shells were annealed at 240 °C for  $\sim 10$  min following  
12 the injection of sulfur and  $\sim 2.5$  h following dropwise addition of the Cd(OA)<sub>2</sub> in ODE.  
13 Sulfur/Cd(OA)<sub>2</sub> addition volumes for shell addition cycles 1-6 were as follows: 0.25, 0.36,  
14 0.49, 0.63, 0.8, and 0.98 mL, respectively.

15 Graded alloyed shells were synthesized by tailoring the molar ratio of S:Se during *in situ*  
16 growth of each layer CdSe<sub>x</sub>S<sub>1-x</sub> (x = 0.9~0.1) over the CdSe core QDs. Subsequently another  
17 two layers of CdS were coated on the alloyed shell. The reaction was cooled to room  
18 temperature using ice water. Ethanol was added, and then the suspension was  
19 centrifuged and the supernatant was removed. The QDs were then dispersed in toluene  
20 for further characterization.

21

### 22 **Anode preparation**

23 A thin and compact TiO<sub>2</sub> blocking layer was deposited on ultrasonically cleaned FTO glass  
24 substrates by hydrolysis of 0.50 mM TiCl<sub>4</sub> solution at 70 °C for 30 min. It was then annealed  
25 at 500 °C for 30 min under ambient atmosphere and left to cool down to room  
26 temperature.

27 A good dispersion of MWCNTs (an average length of 10 μm) in ethanol was prepared by mixing  
28 6 mg of MWCNTs in 15 mL of ethanol and sonicated for 3 hours. TiO<sub>2</sub>-MWCNTs hybrid pastes  
29 with different concentration of MWCNTs were prepared by mixing the precise amount of  
30 ethanolic suspension of MWCNTs into a known weight of TiO<sub>2</sub> paste composed of small (20 nm  
31 in diameter) and large (up to 450 nm in diameter) size anatase particles (18NR-AO).  
32 Subsequently, the above prepared TiO<sub>2</sub>-MWCNTs hybrid pastes were deposited on top of the  
33 compact TiO<sub>2</sub> layer by tape casting. A drying process was followed for 15 min at ambient  
34 conditions and then placed on a hot plate for 6 min at 120 °C. A second layer was then deposited  
35 on the top, following the same procedure<sup>3</sup>. All the photoanodes were then annealed at 500 °C  
36 for 30 min under ambient conditions. For a systematic comparison, bare TiO<sub>2</sub> photoanodes were

1 also prepared under the same conditions. The thickness of all photoanodes was measured using  
2 a profilometer.

3

#### 4 **ZrO<sub>2</sub> film preparation**

5 ZrO<sub>2</sub> films were prepared by using a commercial ZrO<sub>2</sub> nanopowder (Aldrich, particle size  
6 < 100 nm). A single layer of ZrO<sub>2</sub> film was deposited on FTO glass by tape casting, then  
7 annealed in air at 500 °C for 30 min and cooled down to room temperature. We studied  
8 the electron transfer rate by using transient fluorescence spectroscopy on QDs deposited  
9 into TiO<sub>2</sub> or ZrO<sub>2</sub> mesoporous films. The ZrO<sub>2</sub>/QDs film serves as a benchmark sample, in  
10 which the energy levels do not favour electron/hole transfer. The hole transfer rate in this  
11 experiment was monitored by immersing the ZrO<sub>2</sub>/QDs film into the Na<sub>2</sub>S/Na<sub>2</sub>SO<sub>3</sub> solution  
12 (pH ~13) as a hole scavenger.

13

#### 14 **Results and Discussion**

15

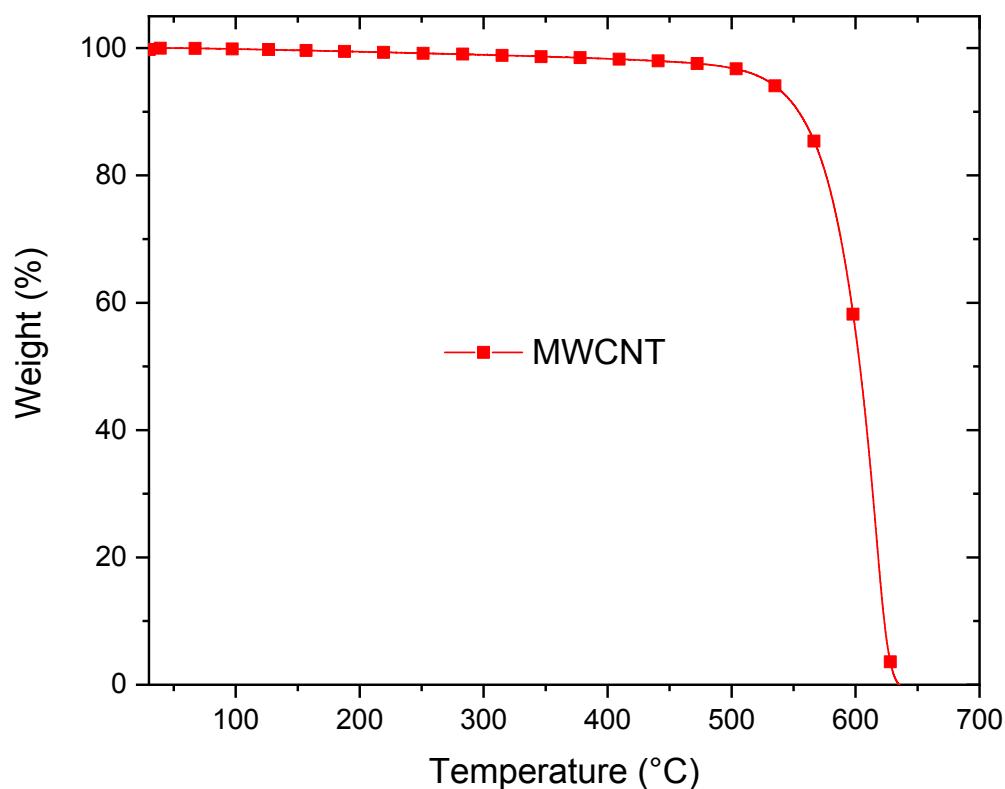

16

17

**Figure 1S. Thermogravimetric analysis of MWCNTs powder.**

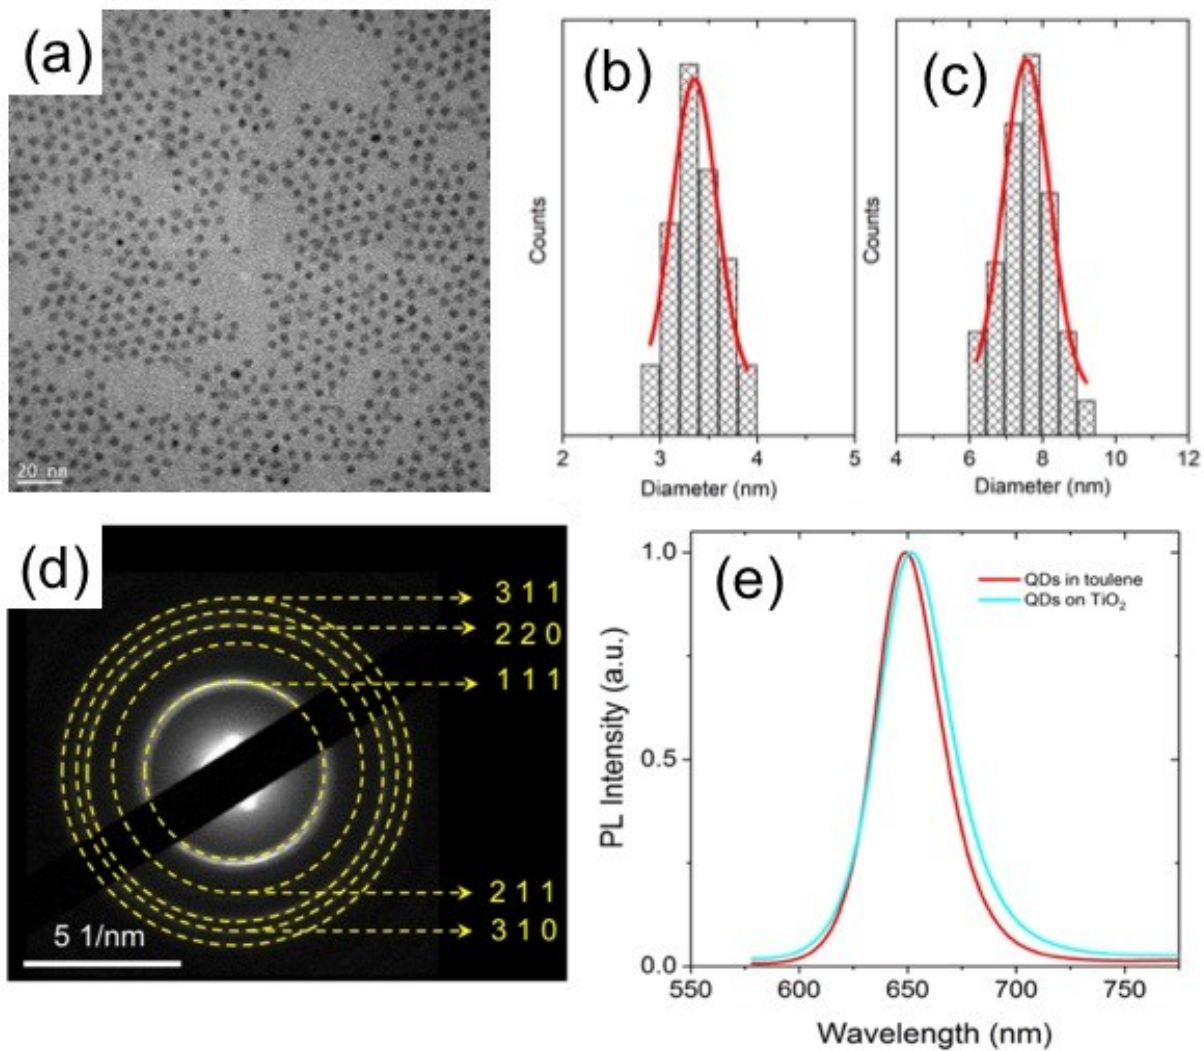

1  
2  
3  
4  
5  
6  
7  
8  
9  
10

**Figure 2S.** Structural properties of colloidal QDs: (a) TEM image of as-synthesized CdSe core QDs before the growth of alloyed shell. Size distribution (solid lines are Gaussian fit of the experimental data): (b) CdSe core QDs; (c) gradient alloyed heterostructured CdSe/(CdSe<sub>x</sub>S<sub>1-x</sub>)<sub>5</sub>/(CdS)<sub>2</sub>QDs; (d) Selected area electron diffraction pattern (SEAD) of gradient alloyed heterostructured CdSe/(CdSe<sub>x</sub>S<sub>1-x</sub>)<sub>5</sub>/(CdS)<sub>2</sub>QDs. (e) PL spectra of as-synthesized gradient alloyed heterostructured CdSe/(CdSe<sub>x</sub>S<sub>1-x</sub>)<sub>5</sub>/(CdS)<sub>2</sub>QDs in toluene and deposited on TiO<sub>2</sub> mesoporous film.

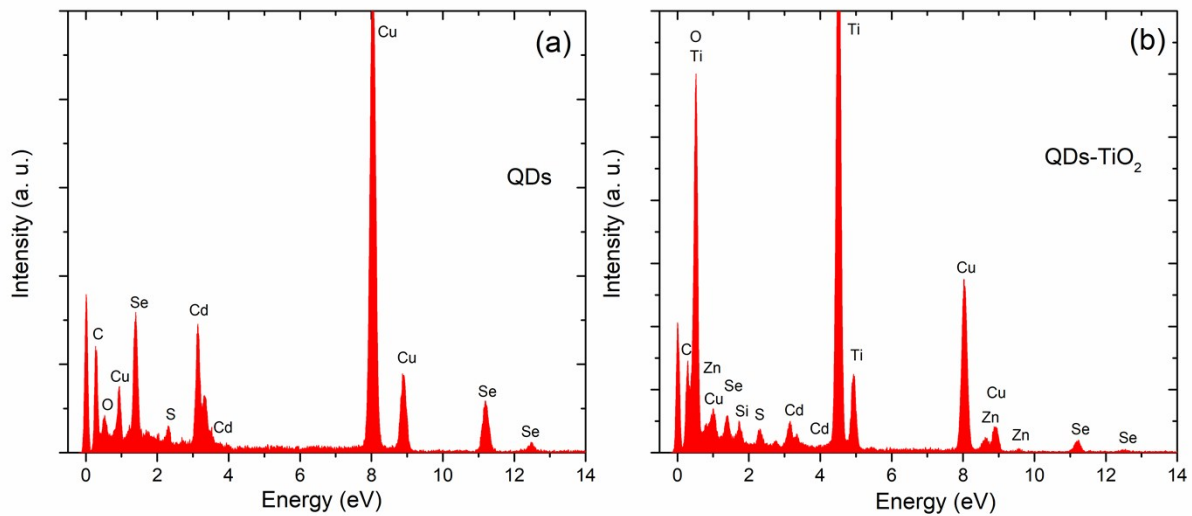

1  
 2 **Figure 3S.** EDS spectra of: (a) colloidal heterostructured QDs; (b) TiO<sub>2</sub>/QDs/ZnS/SiO<sub>2</sub> mesoporous  
 3 film.

4  
 5  
 6  
 7  
 8  
 9  
 10  
 11  
 12



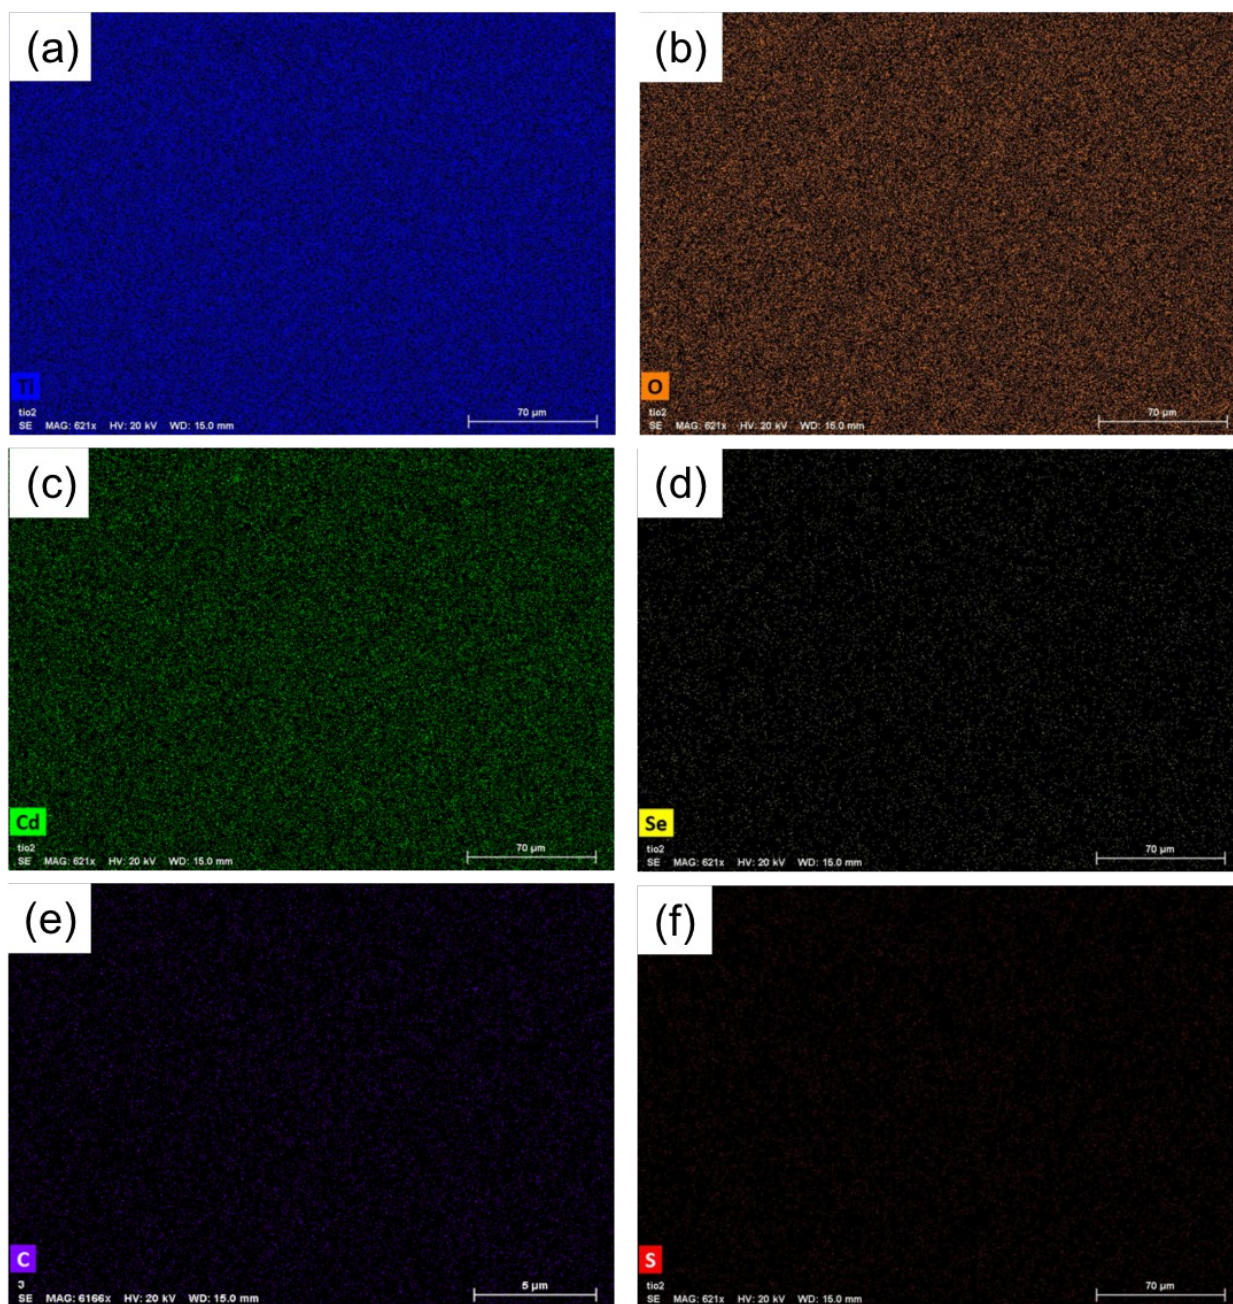

1  
2

3 **Figure 4S.** Elemental mapping by EDS spectroscopy of TiO<sub>2</sub>/QDs: (a) Ti; (b) O; (c) Cd; (d) Se; (e) C  
4 (f) and (f) S.

5 **Table 1 S.** The wt % of the different elements of colloidal QDs sensitized TiO<sub>2</sub> coated photoanode,  
6 according to EDS measurements.

| Elements | Ti    | O     | Cd   | Se   | S    | C    |
|----------|-------|-------|------|------|------|------|
| Wt. %    | 28.93 | 65.19 | 0.39 | 0.11 | 0.09 | 5.29 |

1  
2  
3

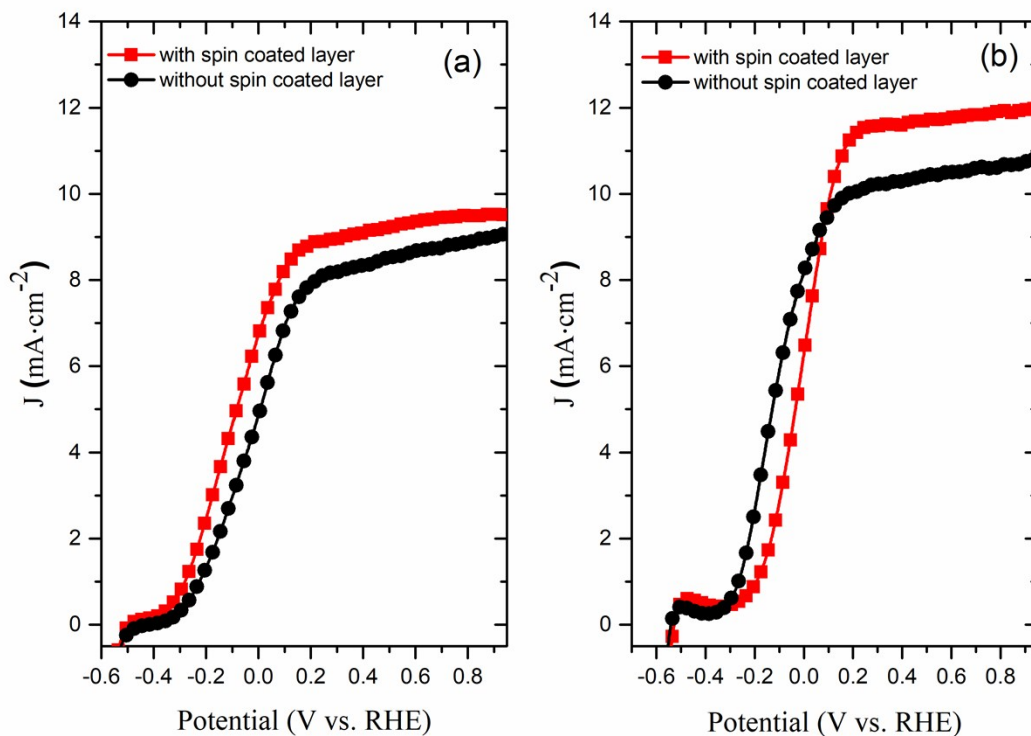

4  
5 **Figure 5S.** Comparison of photocurrent density versus bias potential (versus RHE) of PEC systems  
6 based on colloidal heterostructured QDs sensitized photoanodes with (red square) and without  
7 (black circle) spin coated layer of 20 nm nanoparticles under one sun continuous illumination  
8 (AM 1.5 G, 100 mW·cm<sup>-2</sup>): (a) pristine TiO<sub>2</sub>/QDs; (b) TiO<sub>2</sub>/QDs-MWCNTs hybrid photoanodes.  
9

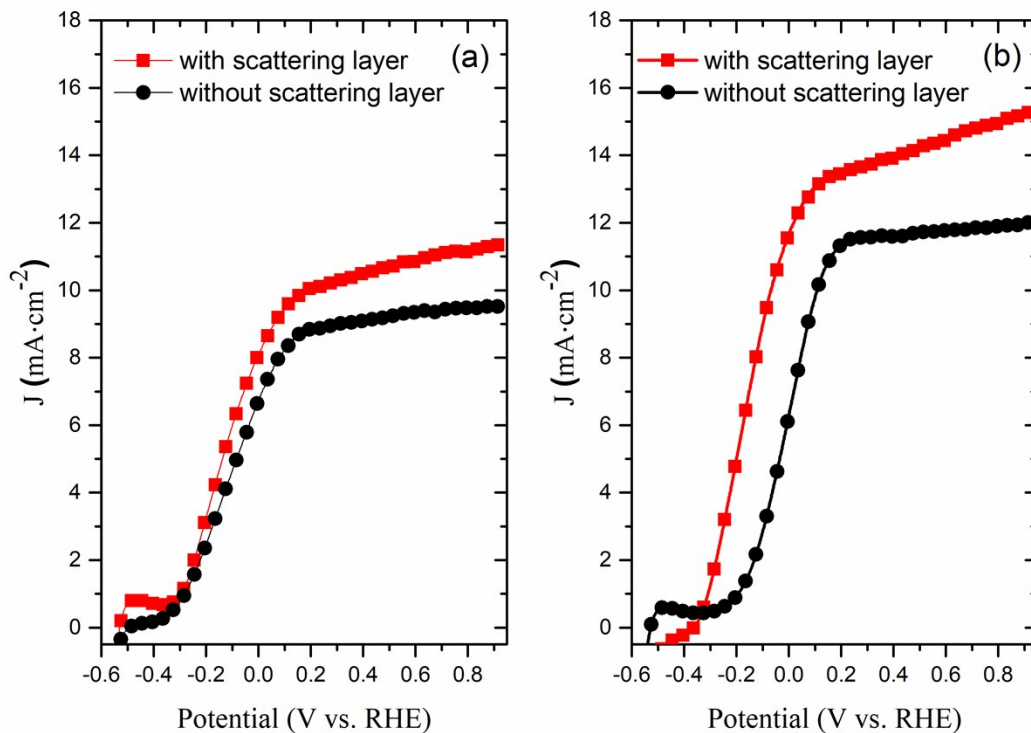

1  
2  
3  
4  
5  
6  
7

**Figure 6S.** Comparison of photocurrent density versus bias potential (versus RHE) of PEC systems based on colloidal heterostructured QDs sensitized photoanodes with (red square) and without (black circle) scattering layer of 150-400 nm nanoparticles under one sun continuous illumination (AM 1.5 G, 100 mW·cm<sup>-2</sup>): (a) pristine TiO<sub>2</sub>/QDs; (b) TiO<sub>2</sub>/QDs-MWCNTs hybrid photoanodes.



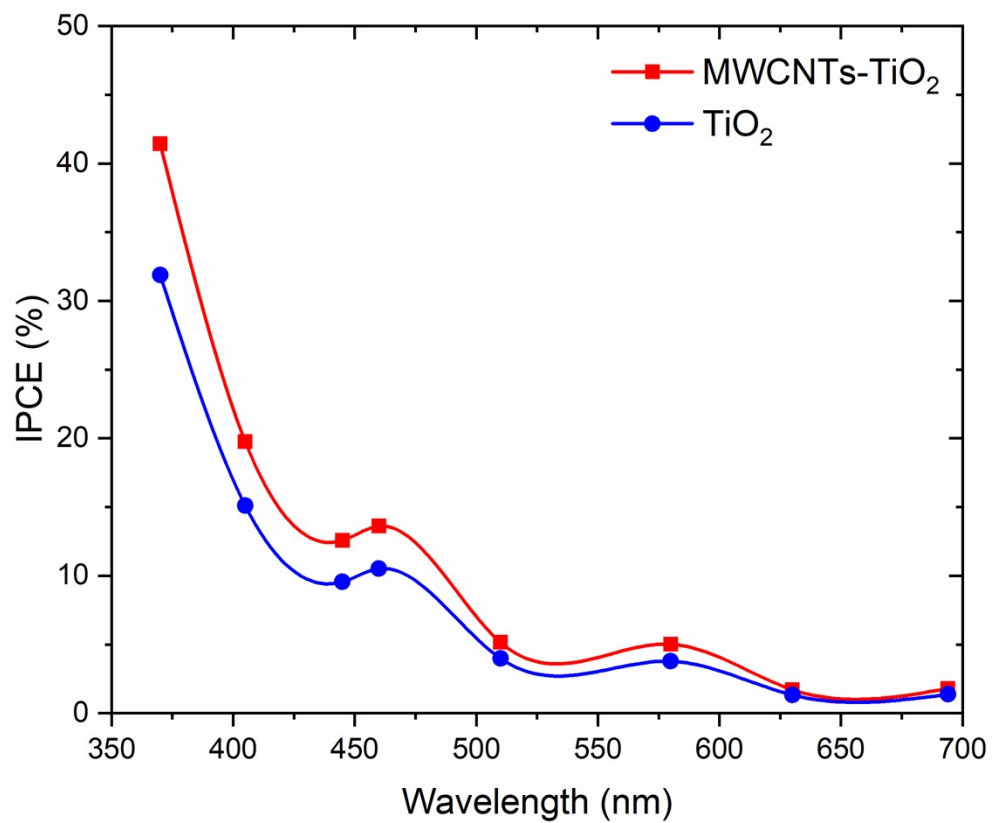

1

2 **Figure 7S.** Incident photon-to-current efficiency (IPCE) spectra of PEC devices based on T/Q-  
 3 MWCNTs (0.015 wt.%) hybrid (red line) and T/Q bare (blue line) photoanodes measured at 1.0 V  
 4 vs RHE under one sun illumination (AM 1.5 G, 100 mW.cm<sup>-2</sup>).

5

6

7

8

9

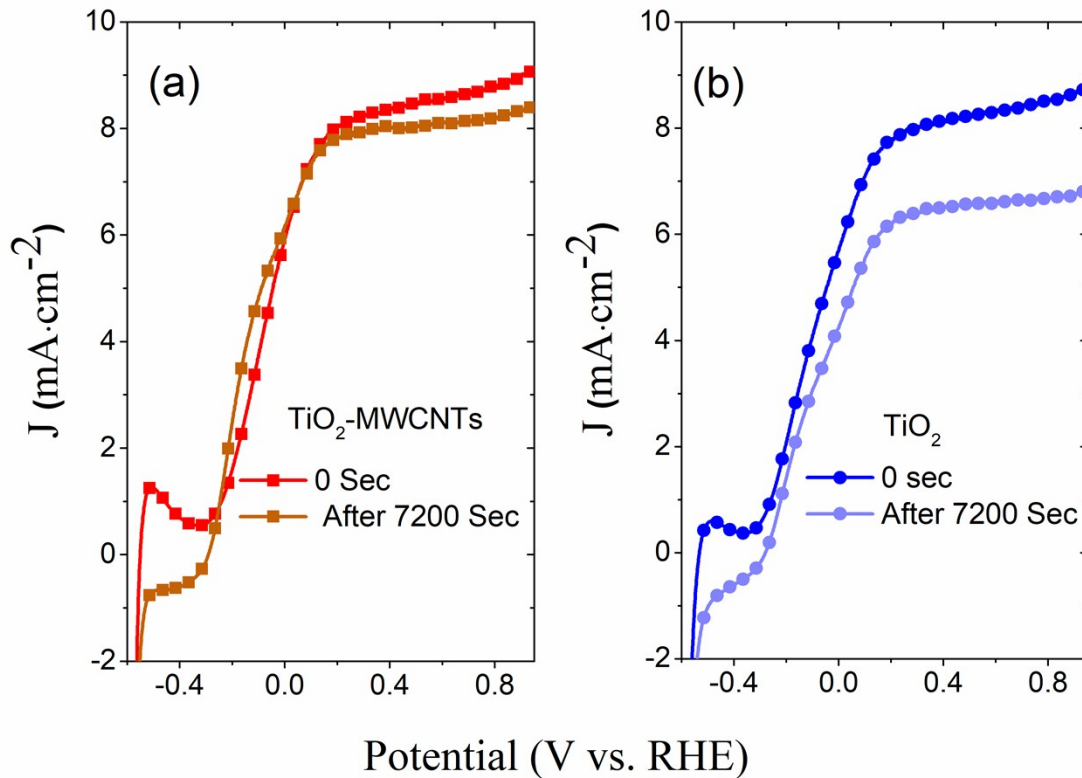

1

2 **Figure 8S.** Comparison of the photocurrent density versus bias potential (versus RHE) of PEC  
 3 systems under one sun illumination (AM 1.5 G, 100 mW·cm<sup>-2</sup>) based on: (a) TiO<sub>2</sub>/QDs-MWCNTs  
 4 hybrid fresh (red square) and after 7200 s (dark red square); (b) TiO<sub>2</sub>/QDs fresh (blue circle) and  
 5 after 7200 s (light blue circle).

6

7 **Table S3.** Comparison of photocurrent density of PEC devices based on colloidal core/thick-shell  
 8 QDs sensitized wide band gap semiconductors of this work and reported in the literature.

9

| Photoanode structure                                                          | QDs shape | Saturated current density (mA·cm <sup>-2</sup> ) | Ref.      |
|-------------------------------------------------------------------------------|-----------|--------------------------------------------------|-----------|
| CdSe/(CdSe <sub>x</sub> S <sub>1-x</sub> )/(CdS) QDs-TiO <sub>2</sub> -MWCNTs | Spherical | 15.9                                             | This work |
| CdSe/CdSe <sub>x</sub> S <sub>1-x</sub> /CdS QDs-TiO <sub>2</sub>             | Pyramidal | 12.0                                             | 4         |
| CdSe/Pb <sub>x</sub> Cd <sub>1-x</sub> S/CdS QDs- TiO <sub>2</sub>            | Spherical | 10.2                                             | 5         |
| CdSe/CdS QDs-TiO <sub>2</sub>                                                 | Spherical | 10.0                                             | 6         |

|                                      |           |     |   |
|--------------------------------------|-----------|-----|---|
| CuInSe/CuInS QDs-TiO <sub>2</sub>    | Spherical | 3.1 | 7 |
| CISES/CdSeS/CdS QDs-TiO <sub>2</sub> | Pyramidal | 5.5 | 8 |
| PbS/CdS QDs-TiO <sub>2</sub>         | Spherical | 5.3 | 9 |

1

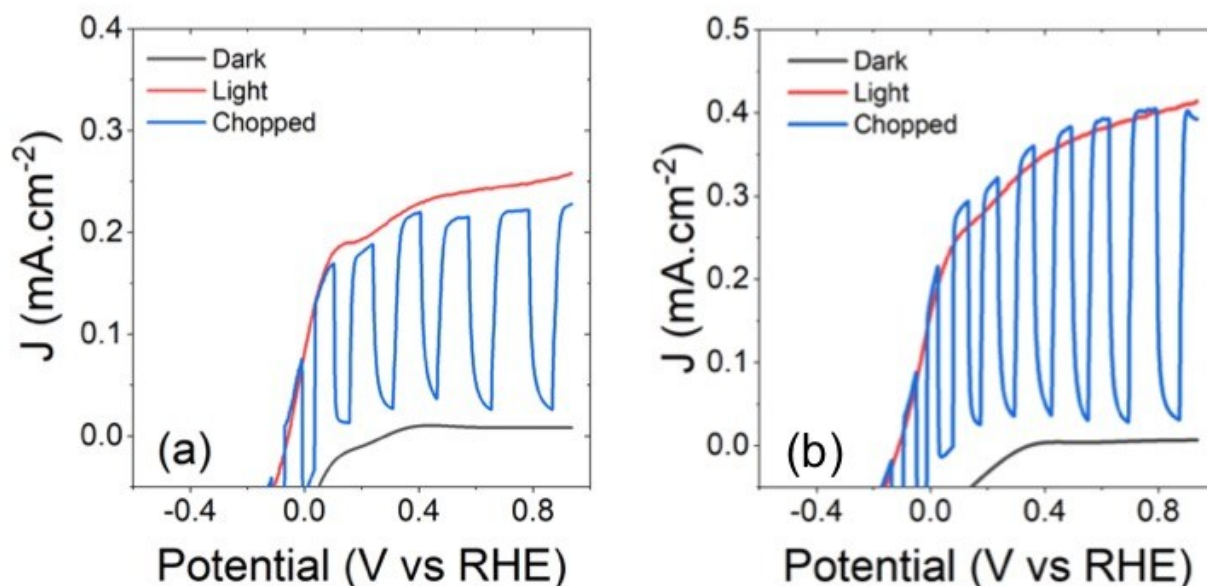

2

3 **Figure 9S.** Photocurrent density-potential curves of PEC devices under dark, continuous and  
 4 chopped illumination (AM 1.5 G, 100 mW.cm<sup>-2</sup>): (a) TiO<sub>2</sub> anode; (b) TiO<sub>2</sub>-MWCNTs hybrid with  
 5 0.015 wt% concentration of MWCNTs.

## 6 Literature comparison of the performance of PEC devices based on TiO<sub>2</sub> with TiO<sub>2</sub>-MWCNTs.

7 To compare the performance of PEC devices based on TiO<sub>2</sub> for H<sub>2</sub> evolution reported in the  
 8 literature with the PEC devices based on bare TiO<sub>2</sub> and hybrid TiO<sub>2</sub>-MWCNTs mesoporous film  
 9 prepared in this work, a series of PEC devices were fabricated by using bare TiO<sub>2</sub> and hybrid  
 10 mesoporous film without colloidal heterostructured QDs sensitization. A systematic comparison  
 11 of photocurrent density of PEC devices based on bare TiO<sub>2</sub> and hybrid TiO<sub>2</sub>-MWCNTs mesoporous  
 12 film (reported in this work) and PEC device based on TiO<sub>2</sub> (reported in the literature), calculated  
 13 from current density-voltage curves under one sun illumination irradiation (AM 1.5 G, 100 mW  
 14 cm<sup>-2</sup>) is reported in Table S2. The photocurrent density of PEC device based on hybrid TiO<sub>2</sub>-  
 15 MWCNTs (0.015 wt.%) is 0.44 mA.cm<sup>-2</sup> at 1.0 V vs RHE, which is ~70% higher than the PEC device  
 16 based on bare TiO<sub>2</sub> mesoporous photoanode (see Figure 9 S). Similarly, Morais et al. reported  
 17 photocurrent density of 0.11 mA.cm<sup>-2</sup> at 1.23 V vs RHE under one sun illumination irradiation  
 18 (AM 1.5 G, 100 mW cm<sup>-2</sup>), which is further boosted to 0.20 mA.cm<sup>-2</sup> at 1.23 V by introducing

1 reduced graphene oxide (0.1 wt%) in TiO<sub>2</sub><sup>10</sup>. Furthermore, due to better electron transport  
 2 properties of nanowires than nanoparticles, Hwang et al.<sup>11</sup> fabricated PEC devices by using rutile  
 3 TiO<sub>2</sub> nanowires and obtained the photocurrent density of 0.73 mA.cm<sup>-2</sup> at 1.5 V vs RHE. This  
 4 photocurrent density is significantly enhanced to 1.1 mA.cm<sup>-2</sup> at 1.5 V vs RHE with atomic layer  
 5 deposition (ALD) of epitaxial rutile TiO<sub>2</sub> shell. Also, Kang et al.<sup>12</sup> reported the photocurrent density  
 6 of 0.19 mA.cm<sup>-2</sup> at 1.23 V vs RHE for PEC device based on TiO<sub>2</sub> nanotube arrays and further  
 7 boosted to 0.73 mA.cm<sup>-2</sup> at 1.23 V vs RHE by reducing the TiO<sub>2</sub> nanotube arrays with NaBH<sub>4</sub>.

8  
 9

10 **Table S4.** Comparison of performance of PEC devices based on TiO<sub>2</sub>-MWCNTs in this work and  
 11 PEC based on TiO<sub>2</sub> reported in the literature.

| Photoanode structure                 | Electrolyte                                                                         | $J_{sc}$<br>(mA.cm <sup>-2</sup> ) @ V vs RHE | Ref.      |
|--------------------------------------|-------------------------------------------------------------------------------------|-----------------------------------------------|-----------|
| TiO <sub>2</sub>                     | Aqueous 0.25 M Na <sub>2</sub> S and 0.35 M Na <sub>2</sub> SO <sub>3</sub> (pH~13) | 0.26 mA.cm <sup>-2</sup> at 1.0 V             | This work |
| TiO <sub>2</sub> -MWCNTs (0.015 wt%) |                                                                                     | 0.44 mA.cm <sup>-2</sup> at 1.0 V             |           |
| pristine TiO <sub>2</sub>            | Aqueous H <sub>2</sub> SO <sub>4</sub> (0.5 mol L <sup>-1</sup> )                   | 0.11 mA.cm <sup>-2</sup> at 1.23 V            | 10        |
| Rutile TiO <sub>2</sub> nanowires    | Aqueous 1 M NaOH                                                                    | 0.73 mA.cm <sup>-2</sup> at 1.5 V             | 11        |
| TiO <sub>2</sub> nanotube arrays     | Aqueous 1 M NaOH (pH=13.9)                                                          | 0.19 mA.cm <sup>-2</sup> at 1.23 V            | 12        |

12

13 **Reference:**

- 14 1. B.O. Dabbousi, J. Rodriguez-Viejo, F.V. Mikulec, J.R. Heine, H. Mattoussi, R. Ober, K.F. Jensen  
 15 and M.G. Bawendi, *J. Phys. Chem. B* 1997, **101**, 9463–9475.  
 16 2. Y. Ghosh, B. D. Mangum, J. L. Casson, D. J. Williams and H. Htoon, J. A. Hollingsworth, *J.*  
 17 *Am. Chem. Soc.*, 2012, **134**, 9634–9643.  
 18 3. (a) K. T. Dembele, G. S. Selopal, C. Soldano, R. Nechache, J. C. Rimada, I. Concina, G.  
 19 Sberveglieri, F. Rosei and A. Vomiero, *J. Phys. Chem. C*, 2013, **117**, 14510–14517; (b) M.  
 20 Mohammadnezhad, G. S. Selopal, Z. M. Wang, B. Stansfield and F. Rosei, *ChemPlusChem.*  
 21 2018, **83**, 682–690.  
 22 4. H. Zhao, G. Liu, F. Vidal, Y. Wang and A. Vomiero, *Nano Energy*, 2018, **53**, 116-124.  
 23 5. R. Adhikari, K. Basu, Y. Zhoua, F. Vetrone, D. Ma, S. Sun, F. Vidala, H. Zhao and F. Rosei,  
 24 *J. Mater. Chem. A*, 2018, **6**, 6822-6829.

- 1 6. R. Adhikari, L. Jin, F. Navarro-Pardo, D. Benetti, B. AlOtaibi, S. Vanka, H. Zhao, Z. Mi, A.  
2 Vomiero and F. Rosei, *Nano Energy*, 2016, **27**, 265-276.
- 3 7. X. Tong, X.-T. Kong, Y. Zhou, F. Navarro-Pardo, G. S. Selopal, S. Sun, A. O. Govorov, H.  
4 Zhao, Z. M. Wang and F. Rosei, *Advanced Energy Materials*, 2018, **8**, 1701432.
- 5 8. X. Tong, X.-T. Kong, C. Wang, Y. Zhou, F. Navarro-Pardo, D. Barba, D. Ma, S. Sun, A. O.  
6 Govorov, H. Zhao, Z. M. Wang and F. Rosei, *Advanced Science*, 2018, **5**, 1800656.
- 7 9. L. Jin, G. Sirigu, X. Tong, A. Camellini, A. Parisini, G. Nicotra, C. Spinella, H. Zhao, S. Sun,  
8 V. Morandi, M. Zavelani-Rossi, F. Rosei and A. Vomiero, *Nano Energy*, 2016, **30**, 531.
- 9 10. A. Morais, C. Longo, J. R. Araujo, M. Barroso, J. R. Durrant and A. F. Nogueira, *Phys.*  
10 *Chem. Chem. Phys.*, 2016, **18**, 2608–2616.
- 11 11. Y. J. Hwang, C. Hahn, B. Liu and P. Yang, *ACS Nano*, 2012, **6**, 5060-5069.
- 12 12. Q. Kang, J. Cao, Y. Zhang, L. Liu, H. Xu and J. Ye, *J. Mater. Chem. A*, 2013, **1**, 5766–5774.
